# Supplementary material for: A bidentate-anionic-group strategy for enhancing electron–phonon coupling and vibronic fluorescence in rare-earth crystals
Source: Royal Society of Chemistry journal article supplement (doi:10.1039/d2tc02364d), 2022-01-01
Supplement: d2tc02364d1.pdf [file d2tc02364d1.pdf]

*Supporting Information for*

**Bidentate-anionic-group strategy for enhancing electron-phonon coupling and vibronic fluorescence in rare-earth crystals**

Jingcheng Feng,<sup>a,c</sup> Fangyan Wang,<sup>b</sup> Wang Liu,<sup>a,c</sup> Fei Liang,<sup>b,\*</sup> Guochun Zhang,<sup>a,c,\*</sup> Haohai Yu,<sup>b</sup> and Huaijin Zhang<sup>b</sup>

<sup>a</sup> Center for Crystal Research and Development, Key Laboratory of Functional Crystals and Laser Technology, Technical Institute of Physics and Chemistry, Chinese Academy of Sciences, Beijing 100190, P. R. China

<sup>b</sup> State Key Laboratory of Crystal Materials and Institute of Crystal Materials, Shandong University, Jinan 250100, P. R. China

<sup>c</sup> Center of Materials Science and Optoelectronics Engineering, University of Chinese Academy of Sciences, Beijing 100049, P. R. China

\* Emails: [liangfei@sdu.edu.cn](mailto:liangfei@sdu.edu.cn) (F. Liang) and [gc Zhang@mail.ipc.ac.cn](mailto:gc Zhang@mail.ipc.ac.cn) (G. C. Zhang)

## 1. Experimental Methods

### 1.1 Crystal growth

$K_3RE(BO_3)_2$  ( $RE=Pr, Nd, \text{ and } Gd$ ) single crystals were grown by means of spontaneous crystallization from self-flux system. Specifically, the molar ratios of  $Gd_2O_3$  (or  $Nd_2O_3$ ):  $K_2CO_3$ :  $H_3BO_3 = 3: 40: 150$  and  $Pr_6O_{11}$ :  $K_2CO_3$ :  $H_3BO_3 = 1: 40: 150$  were employed. The mixture of reagents with high purity was ground thoroughly and put into a platinum crucible with a diameter of 20 mm and a height of 20 mm. The crucible was placed into a vertical programmable temperature furnace. The temperature was raised up to 970 °C and kept for 200 minutes to ensure that the mixture was completely melted and homogeneously mixed, then cooled to 700 °C at a rate of 2 °C/h, and finally cooled to 25 °C at a rate of 30 °C/h. The as-grown transparent crystals were mechanically separated from the platinum crucible for the following measurements of structure and properties.

### 1.2 Solid state synthesis

#### 1.2.1 $K_3RE(BO_3)_2$ ( $RE=Pr, Nd, \text{ and } Gd$ )

Polycrystalline samples were synthesized through high temperature solid state reaction. The mixture of  $Gd_2O_3$  (or  $Nd_2O_3$ ),  $K_2CO_3$ , and  $H_3BO_3$  with molar ratio of 1: 3: 6 as well as  $Pr_6O_{11}$ ,  $K_2CO_3$ , and  $H_3BO_3$  with molar ratio of 1/3: 3: 6 were ground thoroughly, put into a platinum crucible, and then compressed tightly. Next, the crucible was placed into a programmable temperature furnace. Finally, the mixture was heated to 650 °C within 24 hours, kept at this temperature for 48 hours, and then cooled to room temperature within 2 days. Took out the polycrystalline sample and ground it, and repeated the above steps at 850 °C to ensure a more thorough reaction.

#### 1.2.2 $Li_3K_9Gd_3(BO_3)_7$

The raw materials of synthesizing  $Li_3K_9Gd_3(BO_3)_7$  polycrystalline samples are  $Li_2CO_3$ ,  $K_2CO_3$ ,  $Gd_2O_3$ , and  $H_3BO_3$  with molar ratio of 3: 9: 3: 14. The detailed experimental method was the same as that in “1.2.1  $K_3RE(BO_3)_2$  ( $RE=Pr, Nd, \text{ and } Gd$ )”.

#### 1.2.3 $K_3Gd(PO_4)_2$

The mixture of  $Gd_2O_3$ ,  $K_2CO_3$ , and  $NH_4H_2PO_4$  with molar ratio of 1: 3: 4 were ground thoroughly, put into a platinum crucible, and then compressed tightly. The mixture was heated at 300 °C for 5 hours, then cooled to room temperature, and finally heated at 1000 °C for 24 hours.

#### 1.2.4 $KGd(PO_3)_4$

The mixture of  $Gd_2O_3$ ,  $K_2CO_3$ , and  $(NH_4)_2HPO_4$  with molar ratio of 1: 1: 8 were ground thoroughly, put into a platinum crucible, and then compressed tightly. The mixture was heated at 400 °C for 2 days, then cooled to room temperature, and finally heated at 600 °C for 10 hours.

### 1.3 Single crystal X-ray crystallography

Single Crystal X-ray diffraction data were collected using a Bruker D8 Quest diffractometer (Mo K $\alpha$ ,  $\lambda=0.71073$  Å). Indexing and data integration were performed using APEX3 (Difference Vectors method). Absorption correction was performed by the multiscan method implemented in SADABS.<sup>[S1]</sup> Space groups were determined using XPREP implemented in APEX3. Structures were solved using SHELXL-2014 (direct methods) and refined using SHELXL-2014 (full-matrix least-squares on  $F^2$ ) with anisotropic displacement contained in APEX3 program packages. Hydrogen atoms on carbon and nitrogen were calculated in ideal positions with isotropic placement parameters set to  $1.2 \times U_{\text{eq}}$  of the attached atoms.<sup>[S2]</sup>

### 1.4 Powder X-ray diffraction

X-ray diffraction patterns were obtained on a Bruker D8 focus X-ray diffractometer equipped with a diffracted beam monochromator set for Cu-K $\alpha$  radiation ( $\lambda=1.5418$  Å) at room temperature. A scan step width of  $0.02^\circ$  and a fixed counting time of 0.2 s/step were applied to record the patterns in the  $2\theta$  range of  $5-70^\circ$ .

### 1.5 Emission spectra measurements

The fluorescence spectra of Gd-containing crystals were collected by a FLS920 Edinburgh fluorescence spectrometer. The Xenon lamp light of 274–290 nm was used as the incident source. The spectral lines were collected with five repeats.

### 1.6 UV-vis-NIR diffuse reflectance spectrum

UV-vis-NIR diffuse reflectance data were collected on a Cary 7000 spectrophotometer in the spectral range of 200–2500 nm at room temperature. Fluoroethylene was used as a standard.

### 1.7 Raman spectroscopy

The Raman spectrum was collected in the range of  $50-4000$   $\text{cm}^{-1}$  using the InVia Reflex Raman spectrometer with a 532 nm laser excitation. Several transparent single crystals with regular shape and flat surface were prepared in advance.

### 1.8 Phonon calculations

The atomic-level theoretical calculations for  $\text{K}_3\text{Gd}(\text{BO}_3)_2$  and  $\text{K}_3\text{Gd}(\text{PO}_4)_2$  crystal were performed by density functional theory<sup>[S3]</sup> using the Vienna *ab initio* simulation package code,<sup>[S4]</sup> which has been applied on rare-earth materials successfully.<sup>[S5]</sup> In all calculations, the 750 eV cutoff energy and  $(3 \times 3 \times 4)$  Monkhorst-Pack *k*-point meshes were selected to ensure sufficient accuracy of the simulated results.<sup>[S6]</sup> The structural lattices and atomic positions were fully optimized. The exchange–correlation functionals were described by generalized gradient density approximation Perdew–Burke–Ernzerhof (PBE) function<sup>[S7]</sup> and the ion–electron interactions for all elements were modeled by the projector augmented-wave (PAW) potentials.<sup>[S8]</sup> The lattice vibrations of them were calculated by the Phonopy.<sup>[S9]</sup>

## 2. Additional figures

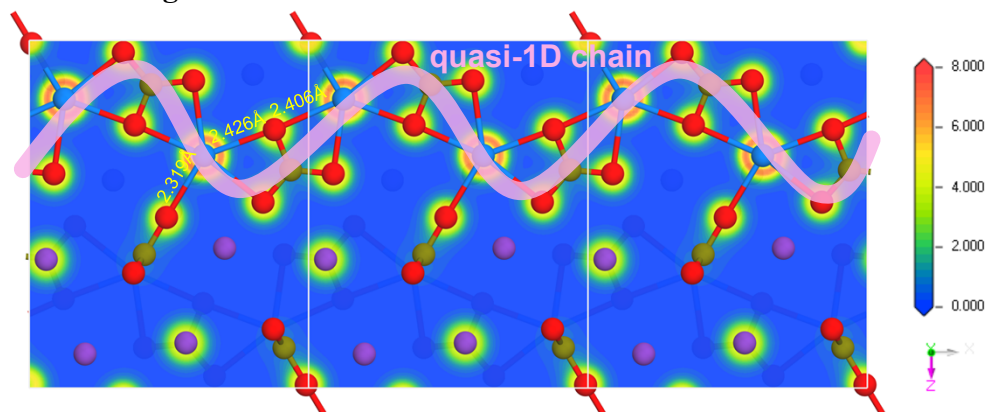

**Figure S1.** Electronic density distribution of  $\text{K}_3\text{Gd}(\text{BO}_3)_2$ . The quasi-1D chain was built by  $\text{Gd}^{3+}$  ion and bidentate- $\text{BO}_3$  groups.

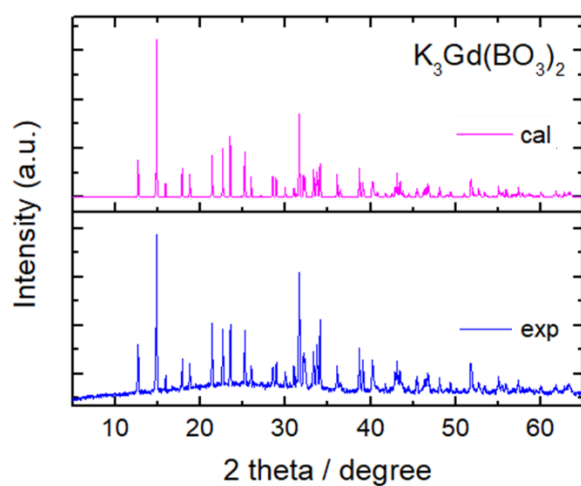

**Figure S2.** Powder X-ray diffraction pattern of polycrystalline  $\text{K}_3\text{Gd}(\text{BO}_3)_2$ .

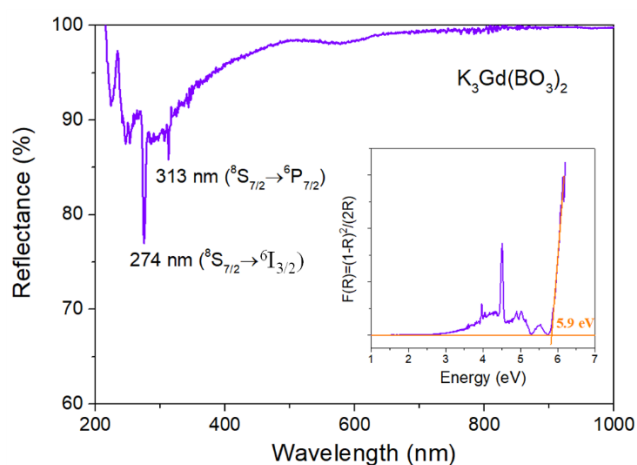

**Figure S3.** UV-vis-NIR diffuse reflectance spectrum of  $\text{K}_3\text{Gd}(\text{BO}_3)_2$ . Insert:  $F(R)$  versus wavelength.

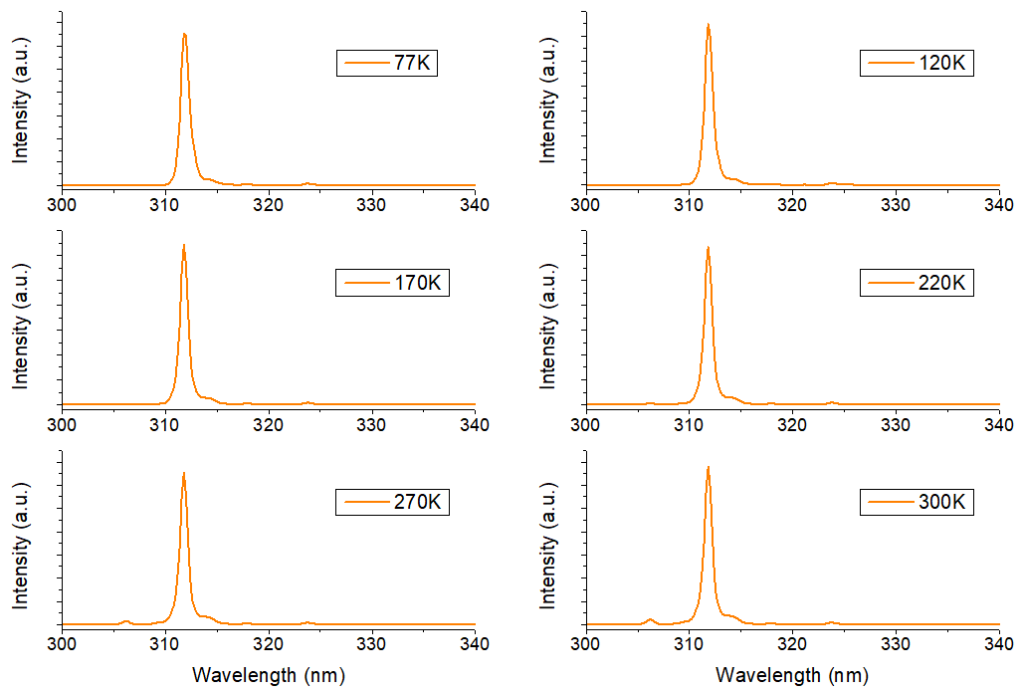

**Figure S4.** Fluorescence emission of  $\text{K}_3\text{Gd}(\text{BO}_3)_2$  under different temperatures.

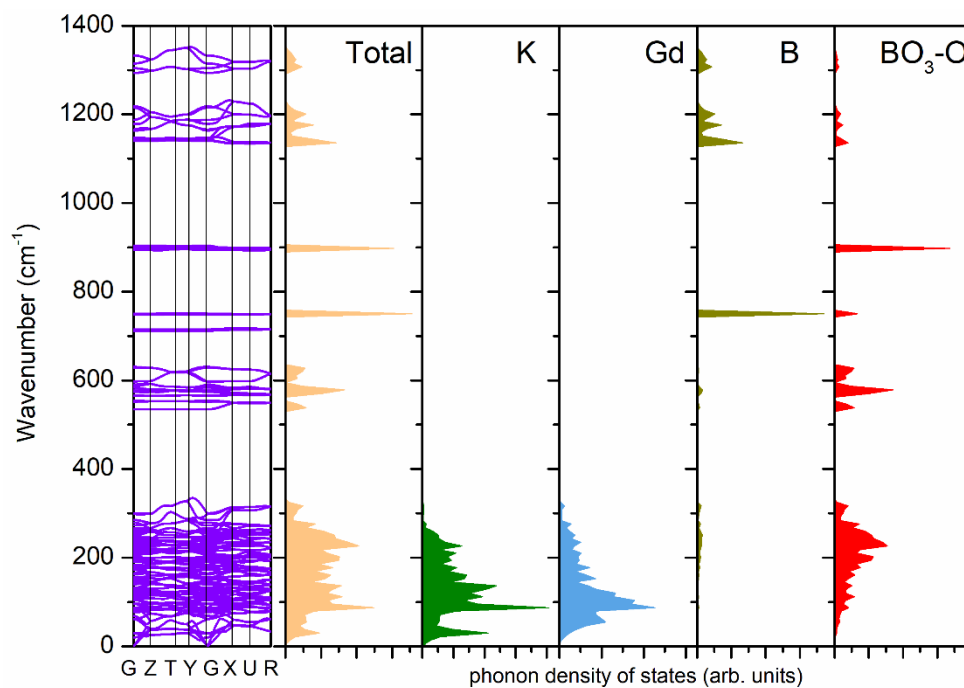

**Figure S5.** Phonon dispersion and phonon projected density of states of  $\text{K}_3\text{Gd}(\text{BO}_3)_2$ .

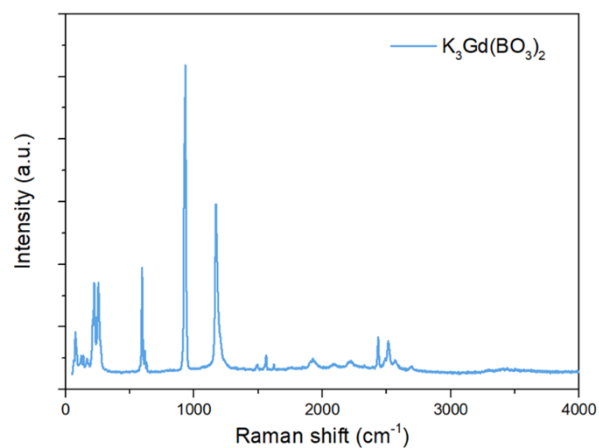

**Figure S6.** Raman spectrum of  $\text{K}_3\text{Gd}(\text{BO}_3)_2$ .

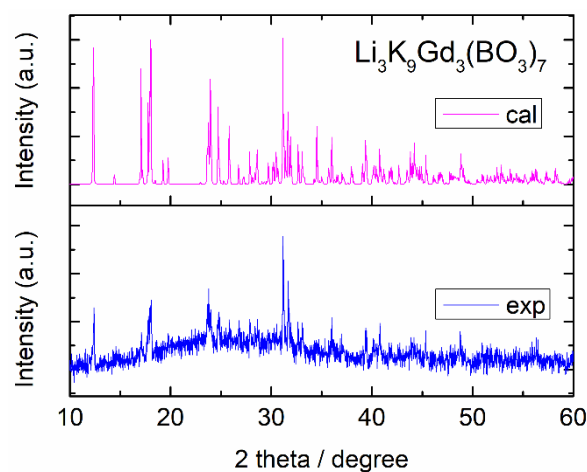

**Figure S7.** Powder X-ray diffraction pattern of polycrystalline  $\text{Li}_3\text{K}_9\text{Gd}_3(\text{BO}_3)_7$ .

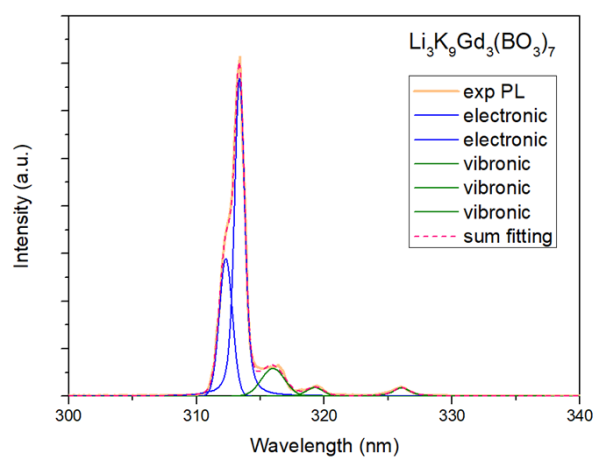

**Figure S8.** Peak fitting results of fluorescence spectra of  $\text{Li}_3\text{K}_9\text{Gd}_3(\text{BO}_3)_7$  at 77 K.

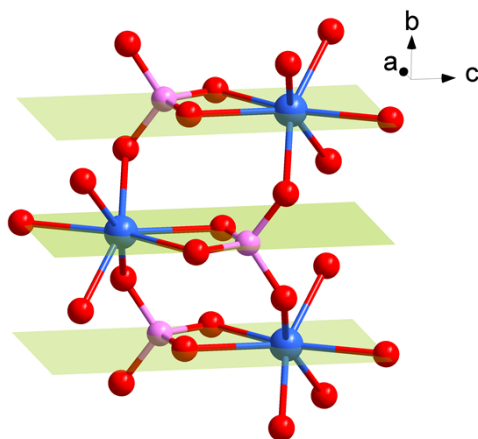

**Figure S9.** Coordination environment of  $\text{K}_3\text{Gd}(\text{PO}_4)_2$ .

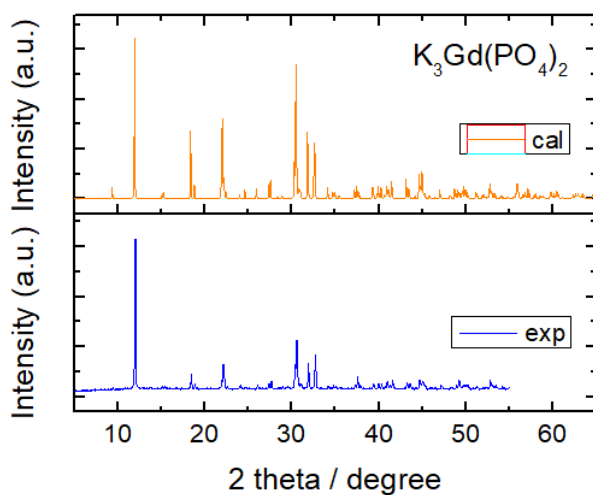

**Figure S10.** Powder X-ray diffraction pattern of  $\text{K}_3\text{Gd}(\text{PO}_4)_2$ .

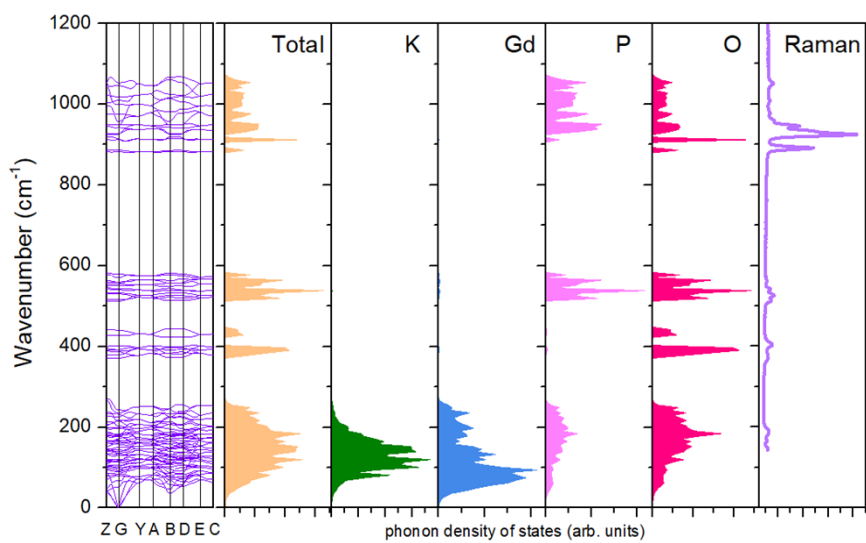

**Figure S11.** Phonon dispersion and phonon projected density of states of  $\text{K}_3\text{Gd}(\text{PO}_4)_2$ . Raman spectrum is also plotted.

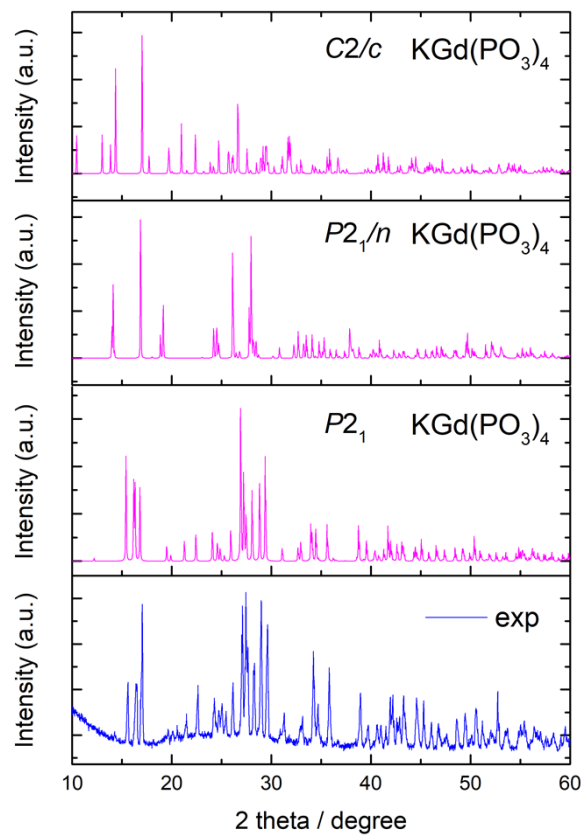

**Figure S12.** Powder X-ray diffraction pattern of  $\text{KGd}(\text{PO}_3)_4$ .



### 3. Additional tables

**Table S1.** Crystal data and structure refinements.

| Empirical formula                              | K <sub>3</sub> Pr(BO <sub>3</sub> ) <sub>2</sub>               | K <sub>3</sub> Nd(BO <sub>3</sub> ) <sub>2</sub>               | K <sub>3</sub> Gd(BO <sub>3</sub> ) <sub>2</sub>               |
|------------------------------------------------|----------------------------------------------------------------|----------------------------------------------------------------|----------------------------------------------------------------|
| CCDC code                                      | 2169921                                                        | 2169922                                                        | 2169923                                                        |
| Formula weight                                 | 375.83                                                         | 379.16                                                         | 392.17                                                         |
| Temperature/K                                  | 296(2)                                                         | 296(2)                                                         | 296(2)                                                         |
| Crystal system                                 | Orthorhombic                                                   | Orthorhombic                                                   | Orthorhombic                                                   |
| Space group                                    | <i>Pnma</i>                                                    | <i>Pnma</i>                                                    | <i>Pnma</i>                                                    |
| <i>a</i> /Å                                    | 9.0940(12)                                                     | 9.0605(17)                                                     | 8.9588(13)                                                     |
| <i>b</i> /Å                                    | 7.1721(11)                                                     | 7.1533(15)                                                     | 7.0621(10)                                                     |
| <i>c</i> /Å                                    | 11.2310(16)                                                    | 11.213(2)                                                      | 11.1427(14)                                                    |
| <i>α</i> /°                                    | 90                                                             | 90                                                             | 90                                                             |
| <i>β</i> /°                                    | 90                                                             | 90                                                             | 90                                                             |
| <i>γ</i> /°                                    | 90                                                             | 90                                                             | 90                                                             |
| Volume/Å <sup>3</sup>                          | 732.52(18)                                                     | 704.98(17)                                                     | 704.98(17)                                                     |
| <i>Z</i>                                       | 4                                                              | 4                                                              | 4                                                              |
| $\rho_{calc}$ g/cm <sup>3</sup>                | 3.408                                                          | 3.465                                                          | 3.695                                                          |
| $\mu$ /mm <sup>-1</sup>                        | 8.332                                                          | 8.838                                                          | 11.154                                                         |
| <i>F</i> (000)                                 | 696.0                                                          | 700.0                                                          | 716.0                                                          |
| Radiation                                      | Mo K $\alpha$ ( $\lambda$ = 0.71073)                           | Mo K $\alpha$ ( $\lambda$ = 0.71073)                           | Mo K $\alpha$ ( $\lambda$ = 0.71073)                           |
| $2\theta$ range for data collection/°          | 5.764 to 61.032                                                | 6.756 to 50.418                                                | 5.834 to 61.022                                                |
| Index ranges                                   | -12 $\leq h \leq$ 9, -6 $\leq k \leq$ 10, -16 $\leq l \leq$ 15 | -10 $\leq h \leq$ 10, -7 $\leq k \leq$ 8, -11 $\leq l \leq$ 13 | -12 $\leq h \leq$ 11, -9 $\leq k \leq$ 9, -12 $\leq l \leq$ 15 |
| Reflections collected                          | 8219                                                           | 7562                                                           | 5042                                                           |
| Independent reflections                        | 1192 [ $R_{int}$ = 0.0929]                                     | 707 [ $R_{int}$ = 0.1364]                                      | 1139 [ $R_{int}$ = 0.0837]                                     |
| Data/restraints/parameters                     | 1192/0/67                                                      | 707/12/67                                                      | 1139/0/68                                                      |
| Goodness-of-fit on $F^2$                       | 1.051                                                          | 1.016                                                          | 1.043                                                          |
| Final <i>R</i> indexes [ $I \geq 2\sigma(I)$ ] | $R_1$ = 0.0414,<br>$wR_2$ = 0.0778                             | $R_1$ = 0.0405,<br>$wR_2$ = 0.0658                             | $R_1$ = 0.0368,<br>$wR_2$ = 0.0617                             |
| Final <i>R</i> indexes [all data]              | $R_1$ = 0.0652,<br>$wR_2$ = 0.0866                             | $R_1$ = 0.0738,<br>$wR_2$ = 0.0757                             | $R_1$ = 0.0571,<br>$wR_2$ = 0.0694                             |
| Largest diff. peak/hole / e Å <sup>-3</sup>    | 1.51/-2.02                                                     | 1.16/-1.35                                                     | 1.75/-2.28                                                     |

**Table S2.** Fractional atomic coordinates ( $\times 10^4$ ) and equivalent isotropic displacement parameters ( $\text{\AA}^2 \times 10^3$ ).

**K<sub>3</sub>Pr(BO<sub>3</sub>)<sub>2</sub>:**

| Atom | <i>x</i>   | <i>y</i> | <i>z</i>   | U(eq)    |
|------|------------|----------|------------|----------|
| B1   | 5618(10)   | 7500     | 1245(8)    | 9.8(18)  |
| B2   | 5910(10)   | 7500     | 6181(8)    | 9.8(19)  |
| K1   | 4392(3)    | 7500     | -1308(2)   | 50.7(9)  |
| K2   | 8001.9(14) | 5033(2)  | -976.8(11) | 17.3(3)  |
| O1   | 6588(5)    | 7500     | 319(5)     | 15.5(14) |
| O2   | 6196(5)    | 7500     | 2397(5)    | 15.9(14) |
| O3   | 4117(6)    | 7500     | 1127(5)    | 16.6(14) |
| O4   | 5096(6)    | 7500     | 5135(5)    | 11.8(12) |
| O5   | 6291(4)    | 9172(6)  | 6699(4)    | 20.6(11) |
| Pr1  | 3737.9(5)  | 7500     | 3321.9(4)  | 7.34(14) |

**K<sub>3</sub>Nd(BO<sub>3</sub>)<sub>2</sub>:**

| Atom | <i>x</i>  | <i>y</i> | <i>z</i>  | U(eq)    |
|------|-----------|----------|-----------|----------|
| B1   | 5637(18)  | 7500     | 6278(15)  | 19(4)    |
| B2   | 9095(17)  | 2500     | 6184(16)  | 20(4)    |
| K1   | 8004(2)   | 9963(3)  | 4020(2)   | 23.2(6)  |
| K2   | 4391(4)   | 7500     | 3696(3)   | 54.7(13) |
| Nd1  | 8739.3(8) | 7500     | 6680.4(7) | 12.7(2)  |
| O1   | 4115(9)   | 7500     | 6144(8)   | 16(2)    |
| O2   | 6203(10)  | 7500     | 7409(8)   | 18(2)    |
| O3   | 6593(9)   | 7500     | 5316(8)   | 18(2)    |
| O4   | 8714(7)   | 4174(8)  | 6703(6)   | 23.9(15) |
| O5   | 9910(9)   | 2500     | 5138(9)   | 16(2)    |

**K<sub>3</sub>Gd(BO<sub>3</sub>)<sub>2</sub>:**

| Atom | <i>x</i>   | <i>y</i>   | <i>z</i>   | U(eq)    |
|------|------------|------------|------------|----------|
| B1   | 643(11)    | 2500       | 6272(8)    | 9.6(19)  |
| B2   | 5878(10)   | 2500       | 3840(8)    | 13(2)    |
| Gd1  | 3745.7(4)  | 2500       | 6688.2(3)  | 7.51(16) |
| K1   | -609(3)    | 2500       | 3700.7(18) | 44.9(7)  |
| K2   | 3003.8(15) | 4946.1(19) | 4022.0(10) | 17.5(3)  |
| O1   | -882(6)    | 2500       | 6162(5)    | 13.4(13) |
| O2   | 1225(5)    | 2500       | 7434(4)    | 12.7(13) |
| O3   | 1631(6)    | 2500       | 5347(5)    | 16.1(13) |
| O4   | 5085(6)    | 2500       | 4907(5)    | 11.2(12) |
| O5   | 6267(4)    | 798(6)     | 3307(3)    | 16.8(10) |

**Table S3.** Anisotropic displacement parameters ( $\text{\AA}^2 \times 10^3$ ).**K<sub>3</sub>Pr(BO<sub>3</sub>)<sub>2</sub>:**

| Atom | U <sub>11</sub> | U <sub>22</sub> | U <sub>33</sub> | U <sub>23</sub> | U <sub>13</sub> | U <sub>12</sub> |
|------|-----------------|-----------------|-----------------|-----------------|-----------------|-----------------|
| B1   | 11(4)           | 14(5)           | 4(4)            | 0               | 0(4)            | 0               |
| B2   | 12(5)           | 12(5)           | 5(4)            | 0               | 5(3)            | 0               |
| K1   | 20.1(12)        | 119(3)          | 12.9(10)        | 0               | -1.6(9)         | 0               |
| K2   | 17.0(7)         | 14.8(7)         | 20.1(7)         | -8.4(6)         | -0.1(5)         | -1.4(6)         |
| O1   | 10(3)           | 29(4)           | 8(3)            | 0               | 0(2)            | 0               |
| O2   | 6(3)            | 33(4)           | 9(3)            | 0               | -2(2)           | 0               |
| O3   | 9(3)            | 30(4)           | 11(3)           | 0               | -1(2)           | 0               |
| O4   | 9(3)            | 14(3)           | 12(3)           | 0               | -2(2)           | 0               |
| O5   | 34(3)           | 6(2)            | 22(2)           | -1.9(18)        | -12.1(18)       | -1(2)           |
| Pr1  | 7.0(2)          | 9.3(2)          | 5.7(2)          | 0               | -0.41(16)       | 0               |

**K<sub>3</sub>Nd(BO<sub>3</sub>)<sub>2</sub>:**

| Atom | U <sub>11</sub> | U <sub>22</sub> | U <sub>33</sub> | U <sub>23</sub> | U <sub>13</sub> | U <sub>12</sub> |
|------|-----------------|-----------------|-----------------|-----------------|-----------------|-----------------|
| B1   | 19(4)           | 18(4)           | 19(4)           | 0               | -0.2(10)        | 0               |
| B2   | 16(9)           | 14(9)           | 31(11)          | 0               | 6(8)            | 0               |
| K1   | 19.0(11)        | 19.4(12)        | 31.2(14)        | 6.6(12)         | 0.2(10)         | 1.2(11)         |
| K2   | 22.6(19)        | 115(4)          | 26(2)           | 0               | -1.7(17)        | 0               |
| Nd1  | 10.0(4)         | 11.2(4)         | 16.8(4)         | 0               | 0.2(4)          | 0               |
| O1   | 16(2)           | 17(2)           | 16(2)           | 0               | -0.5(10)        | 0               |
| O2   | 10(4)           | 28(5)           | 17(5)           | 0               | -1(4)           | 0               |
| O3   | 14(5)           | 22(5)           | 18(6)           | 0               | 8(4)            | 0               |
| O4   | 30(4)           | 20(4)           | 22(4)           | -4(3)           | 6(4)            | -2(3)           |
| O5   | 6(4)            | 18(5)           | 25(6)           | 0               | -5(4)           | 0               |

**K<sub>3</sub>Gd(BO<sub>3</sub>)<sub>2</sub>:**

| Atom | U <sub>11</sub> | U <sub>22</sub> | U <sub>33</sub> | U <sub>23</sub> | U <sub>13</sub> | U <sub>12</sub> |
|------|-----------------|-----------------|-----------------|-----------------|-----------------|-----------------|
| B1   | 6(5)            | 10(5)           | 14(4)           | 0               | 5(4)            | 0               |
| B2   | 9(5)            | 15(6)           | 15(4)           | 0               | 1(3)            | 0               |
| Gd1  | 6.4(2)          | 8.8(3)          | 7.3(2)          | 0               | 0.34(14)        | 0               |
| K1   | 20.0(12)        | 99(2)           | 15.6(9)         | 0               | -3.0(9)         | 0               |
| K2   | 15.7(7)         | 15.3(7)         | 21.3(6)         | 7.5(6)          | 0.7(5)          | 0.5(6)          |
| O1   | 6(3)            | 22(4)           | 12(3)           | 0               | 0(2)            | 0               |
| O2   | 8(3)            | 21(3)           | 8(2)            | 0               | -2(2)           | 0               |
| O3   | 7(3)            | 29(4)           | 12(2)           | 0               | 5(2)            | 0               |
| O4   | 11(3)           | 10(3)           | 13(3)           | 0               | -1(2)           | 0               |
| O5   | 28(3)           | 7(2)            | 15(2)           | -0.9(16)        | 7.8(17)         | -0.1(19)        |

**Table S4.** Selected bond lengths.

**K<sub>3</sub>Pr(BO<sub>3</sub>)<sub>2</sub>:**

| Atom | Atom             | Length/Å  | Atom | Atom              | Length/Å   |
|------|------------------|-----------|------|-------------------|------------|
| B1   | K1               | 3.077(9)  | K2   | O4 <sup>3</sup>   | 2.766(4)   |
| B1   | K1 <sup>1</sup>  | 3.5868(6) | K2   | O4 <sup>13</sup>  | 2.802(4)   |
| B1   | K1 <sup>2</sup>  | 3.5868(6) | K2   | O5 <sup>14</sup>  | 3.152(4)   |
| B1   | O1               | 1.364(10) | K2   | O5 <sup>15</sup>  | 3.135(4)   |
| B1   | O2               | 1.397(10) | K2   | O5 <sup>12</sup>  | 3.091(4)   |
| B1   | O3               | 1.372(11) | K2   | Pr1 <sup>3</sup>  | 3.5311(13) |
| B1   | Pr1 <sup>3</sup> | 2.878(9)  | O1   | K2 <sup>9</sup>   | 2.627(4)   |
| B1   | Pr1              | 2.892(9)  | O1   | Pr1 <sup>3</sup>  | 2.481(5)   |
| B2   | K1 <sup>3</sup>  | 3.170(9)  | O2   | K2 <sup>5</sup>   | 2.677(4)   |
| B2   | K1 <sup>4</sup>  | 3.140(9)  | O2   | K2 <sup>7</sup>   | 2.677(4)   |
| B2   | K2 <sup>5</sup>  | 3.187(7)  | O2   | Pr1 <sup>3</sup>  | 2.448(5)   |
| B2   | K2 <sup>6</sup>  | 3.190(8)  | O2   | Pr1               | 2.465(5)   |
| B2   | K2 <sup>7</sup>  | 3.187(7)  | O3   | K2 <sup>2</sup>   | 2.654(4)   |
| B2   | K2 <sup>8</sup>  | 3.190(8)  | O3   | K2 <sup>16</sup>  | 2.654(4)   |
| B2   | O4               | 1.389(10) | O3   | Pr1               | 2.489(6)   |
| B2   | O5               | 1.378(6)  | O4   | K2 <sup>8</sup>   | 2.766(4)   |
| B2   | O5 <sup>9</sup>  | 1.378(6)  | O4   | K2 <sup>6</sup>   | 2.766(4)   |
| K1   | B1 <sup>2</sup>  | 3.5868(6) | O4   | K2 <sup>7</sup>   | 2.802(4)   |
| K1   | B1 <sup>1</sup>  | 3.5868(6) | O4   | K2 <sup>5</sup>   | 2.802(4)   |
| K1   | B2 <sup>6</sup>  | 3.170(9)  | O4   | Pr1               | 2.381(5)   |
| K1   | B2 <sup>10</sup> | 3.140(9)  | O5   | K1 <sup>3</sup>   | 3.095(4)   |
| K1   | K2 <sup>11</sup> | 3.745(2)  | O5   | K1 <sup>4</sup>   | 3.071(5)   |
| K1   | O1               | 2.707(6)  | O5   | K2 <sup>7</sup>   | 3.135(4)   |
| K1   | O3               | 2.747(6)  | O5   | K2 <sup>17</sup>  | 3.091(4)   |
| K1   | O5 <sup>12</sup> | 3.071(5)  | O5   | K2 <sup>8</sup>   | 3.152(4)   |
| K1   | O5 <sup>8</sup>  | 3.095(4)  | O5   | Pr1 <sup>18</sup> | 2.387(4)   |
| K1   | O5 <sup>10</sup> | 3.071(5)  | Pr1  | B1 <sup>6</sup>   | 2.878(9)   |
| K1   | O5 <sup>6</sup>  | 3.095(4)  | Pr1  | K2 <sup>8</sup>   | 3.5311(13) |
| K2   | B2 <sup>3</sup>  | 3.190(8)  | Pr1  | K2 <sup>6</sup>   | 3.5311(13) |
| K2   | B2 <sup>13</sup> | 3.187(7)  | Pr1  | K2 <sup>7</sup>   | 3.5653(14) |
| K2   | K2 <sup>9</sup>  | 3.539(3)  | Pr1  | O1 <sup>6</sup>   | 2.481(5)   |
| K2   | O1               | 2.627(4)  | Pr1  | O2 <sup>6</sup>   | 2.448(5)   |
| K2   | O2 <sup>13</sup> | 2.677(4)  | Pr1  | O5 <sup>18</sup>  | 2.387(4)   |
| K2   | O3 <sup>2</sup>  | 2.654(4)  | Pr1  | O5 <sup>19</sup>  | 2.387(4)   |

<sup>1</sup>1-X,2-Y,-Z; <sup>2</sup>1-X,1-Y,-Z; <sup>3</sup>1/2+X,+Y,1/2-Z; <sup>4</sup>+X,+Y,1+Z; <sup>5</sup>3/2-X,1-Y,1/2+Z; <sup>6</sup>-1/2+X,+Y,1/2-Z; <sup>7</sup>3/2-X,1/2+Y,1/2+Z; <sup>8</sup>-1/2+X,3/2-Y,1/2-Z; <sup>9</sup>+X,3/2-Y,+Z; <sup>10</sup>+X,+Y,-1+Z; <sup>11</sup>-1/2+X,+Y,-1/2-Z; <sup>12</sup>+X,3/2-Y,-1+Z; <sup>13</sup>3/2-X,1-Y,-1/2+Z; <sup>14</sup>1/2+X,3/2-Y,1/2-Z; <sup>15</sup>3/2-X,-1/2+Y,-1/2+Z; <sup>16</sup>1-X,1/2+Y,-Z; <sup>17</sup>+X,3/2-Y,1+Z; <sup>18</sup>1-X,2-Y,1-Z; <sup>19</sup>1-X,-1/2+Y,1-Z

**K<sub>3</sub>Nd(BO<sub>3</sub>)<sub>2</sub>:**

| Atom | Atom             | Length/Å  | Atom | Atom             | Length/Å  |
|------|------------------|-----------|------|------------------|-----------|
| B1   | K2               | 3.108(17) | K2   | O1               | 2.757(10) |
| B1   | K2 <sup>1</sup>  | 3.5769(8) | K2   | O3               | 2.698(9)  |
| B1   | K2 <sup>2</sup>  | 3.5769(8) | K2   | O4 <sup>1</sup>  | 3.091(7)  |
| B1   | Nd1              | 2.847(16) | K2   | O4 <sup>14</sup> | 3.062(7)  |
| B1   | Nd1 <sup>3</sup> | 2.863(17) | K2   | O4 <sup>15</sup> | 3.091(7)  |
| B1   | O1               | 1.387(18) | K2   | O4 <sup>12</sup> | 3.062(7)  |
| B1   | O2               | 1.368(18) | Nd1  | B1 <sup>16</sup> | 2.863(17) |
| B1   | O3               | 1.383(18) | Nd1  | K1 <sup>17</sup> | 3.552(2)  |
| B2   | K1 <sup>4</sup>  | 3.188(15) | Nd1  | K1 <sup>7</sup>  | 3.528(2)  |
| B2   | K1 <sup>5</sup>  | 3.172(13) | Nd1  | O1 <sup>16</sup> | 2.463(9)  |
| B2   | K1 <sup>6</sup>  | 3.172(13) | Nd1  | O2               | 2.439(10) |
| B2   | K1 <sup>7</sup>  | 3.188(15) | Nd1  | O2 <sup>16</sup> | 2.455(10) |
| B2   | K2 <sup>8</sup>  | 3.132(18) | Nd1  | O3               | 2.474(9)  |
| B2   | K2 <sup>1</sup>  | 3.162(16) | Nd1  | O4 <sup>7</sup>  | 2.380(6)  |
| B2   | O4               | 1.375(10) | Nd1  | O4               | 2.380(6)  |
| B2   | O4 <sup>9</sup>  | 1.375(10) | Nd1  | O5 <sup>6</sup>  | 2.378(9)  |
| B2   | O5               | 1.386(19) | O1   | K1 <sup>2</sup>  | 2.648(6)  |
| K1   | B2 <sup>6</sup>  | 3.172(13) | O1   | K1 <sup>18</sup> | 2.648(6)  |
| K1   | B2 <sup>10</sup> | 3.188(15) | O1   | Nd1 <sup>3</sup> | 2.463(9)  |
| K1   | K1 <sup>7</sup>  | 3.523(5)  | O2   | K1 <sup>19</sup> | 2.660(7)  |
| K1   | Nd1              | 3.528(2)  | O2   | K1 <sup>20</sup> | 2.660(7)  |
| K1   | O1 <sup>2</sup>  | 2.648(6)  | O2   | Nd1 <sup>3</sup> | 2.455(9)  |
| K1   | O2 <sup>11</sup> | 2.660(7)  | O3   | K1 <sup>7</sup>  | 2.617(7)  |
| K1   | O3               | 2.617(7)  | O4   | K1 <sup>5</sup>  | 3.133(7)  |
| K1   | O4 <sup>7</sup>  | 3.138(7)  | O4   | K1 <sup>20</sup> | 3.081(7)  |
| K1   | O4 <sup>12</sup> | 3.081(7)  | O4   | K1 <sup>7</sup>  | 3.137(7)  |
| K1   | O4 <sup>13</sup> | 3.133(7)  | O4   | K2 <sup>8</sup>  | 3.062(7)  |
| K1   | O5 <sup>10</sup> | 2.801(7)  | O4   | K2 <sup>1</sup>  | 3.091(7)  |
| K1   | O5 <sup>6</sup>  | 2.751(7)  | O5   | K1 <sup>4</sup>  | 2.801(7)  |
| K2   | B1 <sup>2</sup>  | 3.5769(8) | O5   | K1 <sup>7</sup>  | 2.801(7)  |
| K2   | B1 <sup>1</sup>  | 3.5769(8) | O5   | K1 <sup>6</sup>  | 2.751(7)  |
| K2   | B2 <sup>14</sup> | 3.132(18) | O5   | K1 <sup>5</sup>  | 2.751(7)  |
| K2   | B2 <sup>1</sup>  | 3.162(16) | O5   | Nd1 <sup>6</sup> | 2.378(9)  |

<sup>1</sup>1-X,1-Y,1-Z; <sup>2</sup>1-X,2-Y,1-Z; <sup>3</sup>-1/2+X,+Y,3/2-Z; <sup>4</sup>+X,-1+Y,+Z; <sup>5</sup>2-X,-1/2+Y,1-Z; <sup>6</sup>2-X,1-Y,1-Z; <sup>7</sup>+X,3/2-Y,+Z; <sup>8</sup>3/2-X,1-Y,1/2+Z; <sup>9</sup>+X,1/2-Y,+Z; <sup>10</sup>+X,1+Y,+Z; <sup>11</sup>3/2-X,2-Y,-1/2+Z; <sup>12</sup>3/2-X,1/2+Y,-1/2+Z; <sup>13</sup>2-X,1/2+Y,1-Z; <sup>14</sup>3/2-X,1-Y,-1/2+Z; <sup>15</sup>1-X,1/2+Y,1-Z; <sup>16</sup>1/2+X,+Y,3/2-Z; <sup>17</sup>2-X,2-Y,1-Z; <sup>18</sup>1-X,-1/2+Y,1-Z; <sup>19</sup>3/2-X,2-Y,1/2+Z; <sup>20</sup>3/2-X,-1/2+Y,1/2+Z

**K<sub>3</sub>Gd(BO<sub>3</sub>)<sub>2</sub>:**

| Atom | Atom             | Length/Å   | Atom | Atom              | Length/Å |
|------|------------------|------------|------|-------------------|----------|
| B1   | Gd1              | 2.818(10)  | K1   | O1                | 2.753(6) |
| B1   | Gd1 <sup>1</sup> | 2.838(9)   | K1   | O3                | 2.718(6) |
| B1   | K1 <sup>2</sup>  | 3.5313(5)  | K1   | O5 <sup>14</sup>  | 3.045(4) |
| B1   | K1 <sup>3</sup>  | 3.5313(5)  | K1   | O5 <sup>13</sup>  | 3.045(4) |
| B1   | K1               | 3.077(9)   | K1   | O5 <sup>15</sup>  | 3.077(4) |
| B1   | O1               | 1.373(10)  | K1   | O5 <sup>12</sup>  | 3.077(4) |
| B1   | O2               | 1.396(10)  | K2   | B2 <sup>8</sup>   | 3.152(8) |
| B1   | O3               | 1.358(10)  | K2   | K2 <sup>6</sup>   | 3.455(3) |
| B2   | K1 <sup>4</sup>  | 3.152(9)   | K2   | O1 <sup>2</sup>   | 2.628(4) |
| B2   | K1 <sup>5</sup>  | 3.128(9)   | K2   | O2 <sup>16</sup>  | 2.619(4) |
| B2   | K2 <sup>6</sup>  | 3.107(8)   | K2   | O3                | 2.584(4) |
| B2   | K2 <sup>7</sup>  | 3.152(8)   | K2   | O4                | 2.726(4) |
| B2   | K2               | 3.107(8)   | K2   | O4 <sup>8</sup>   | 2.759(4) |
| B2   | K2 <sup>8</sup>  | 3.152(8)   | K2   | O5 <sup>6</sup>   | 3.076(4) |
| B2   | O4               | 1.385(10)  | K2   | O5 <sup>11</sup>  | 3.106(4) |
| B2   | O5 <sup>6</sup>  | 1.385(6)   | K2   | O5 <sup>14</sup>  | 3.071(4) |
| B2   | O5               | 1.385(6)   | O1   | Gd1 <sup>1</sup>  | 2.419(5) |
| Gd1  | B1 <sup>9</sup>  | 2.838(9)   | O1   | K2 <sup>17</sup>  | 2.628(4) |
| Gd1  | K2 <sup>6</sup>  | 3.5002(12) | O1   | K2 <sup>2</sup>   | 2.628(4) |
| Gd1  | K2               | 3.5002(12) | O2   | Gd1 <sup>1</sup>  | 2.427(5) |
| Gd1  | K2 <sup>8</sup>  | 3.5156(14) | O2   | K2 <sup>18</sup>  | 2.619(4) |
| Gd1  | O1 <sup>9</sup>  | 2.419(5)   | O2   | K2 <sup>19</sup>  | 2.619(4) |
| Gd1  | O2 <sup>9</sup>  | 2.427(5)   | O3   | K2 <sup>6</sup>   | 2.584(4) |
| Gd1  | O2               | 2.406(5)   | O4   | K2 <sup>8</sup>   | 2.759(4) |
| Gd1  | O3               | 2.413(5)   | O4   | K2 <sup>6</sup>   | 2.726(4) |
| Gd1  | O4               | 2.319(5)   | O4   | K2 <sup>7</sup>   | 2.759(4) |
| Gd1  | O5 <sup>10</sup> | 2.329(4)   | O5   | Gd1 <sup>10</sup> | 2.329(4) |
| Gd1  | O5 <sup>11</sup> | 2.329(4)   | O5   | K1 <sup>4</sup>   | 3.077(4) |
| K1   | B1 <sup>2</sup>  | 3.5313(5)  | O5   | K1 <sup>5</sup>   | 3.045(4) |
| K1   | B1 <sup>3</sup>  | 3.5313(5)  | O5   | K2 <sup>6</sup>   | 3.076(4) |
| K1   | B2 <sup>12</sup> | 3.152(9)   | O5   | K2 <sup>7</sup>   | 3.106(4) |
| K1   | B2 <sup>13</sup> | 3.128(9)   | O5   | K2 <sup>20</sup>  | 3.071(4) |
| K1   | K2               | 3.686(2)   |      |                   |          |

<sup>1</sup>-1/2+X,+Y,3/2-Z; <sup>2</sup>-X,1-Y,1-Z; <sup>3</sup>-X,-Y,1-Z; <sup>4</sup>1+X,+Y,+Z; <sup>5</sup>1/2+X,+Y,1/2-Z; <sup>6</sup>+X,1/2-Y,+Z; <sup>7</sup>1-X,-1/2+Y,1-Z; <sup>8</sup>1-X,1-Y,1-Z; <sup>9</sup>1/2+X,+Y,3/2-Z; <sup>10</sup>1-X,-Y,1-Z; <sup>11</sup>1-X,1/2+Y,1-Z; <sup>12</sup>-1+X,+Y,+Z; <sup>13</sup>-1/2+X,+Y,1/2-Z; <sup>14</sup>-1/2+X,1/2-Y,1/2-Z; <sup>15</sup>-1+X,1/2-Y,+Z; <sup>16</sup>1/2-X,1-Y,-1/2+Z; <sup>17</sup>-X,-1/2+Y,1-Z; <sup>18</sup>1/2-X,1-Y,1/2+Z; <sup>19</sup>1/2-X,-1/2+Y,1/2+Z; <sup>20</sup>1/2+X,1/2-Y,1/2-Z

## References

- [S1] M. Adam, P. Dera and M. Ruf, Integrated solutions for most efficient in-house high-pressure single-crystal experiments, *Acta Cryst. A*, 2018, **A74**, a315.
- [S2] G. M. Sheldrick, Crystal structure refinement with SHELXL, *Acta Cryst. C*, 2015, **C71**, 3–8.
- [S3] W. Kohn, Nobel lecture: Electronic structure of matter-wave functions and density functionals, *Rev. Mod. Phys.*, 1999, **71**, 1253–1266.
- [S4] G. Kresse and J. Furthmuller, Efficient iterative schemes for *ab initio* total-energy calculations using a plane-wave basis set, *Phys. Rev. B*, 1996, **54**, 11169–11186.
- [S5] F. Liang, L. Kang, Z. S. Lin, Y. C. Wu and C. T. Chen, Analysis and prediction of Mid-IR nonlinear optical metal sulfides with diamond-like structures, *Coord. Chem. Rev.*, 2017, **333**, 57–70.
- [S6] H. J. Monkhorst and J. D. Pack, Special points for Brillouin-Zone integrations, *Phys. Rev. B*, 1976, **13**, 5188–5192.
- [S7] J. P. Perdew, K. Burke and M. Ernzerhof, Generalized gradient approximation made simple, *Phys. Rev. Lett.*, 1996, **77**, 3865–3868.
- [S8] G. Kresse and D. Joubert, From ultrasoft pseudopotentials to the projector augmented-wave method, *Phys. Rev. B*, 1999, **59**, 1758–1775.
- [S9] A. Togo and I. Tanaka, First principles phonon calculations in materials science, *Scr. Mater.*, 2015, **108**, 1–5.
